# Supplementary material
Source: ML conference proceedings conference paper supplement (https://openreview.net/forum?id=F5bDWU4M0J)
Supplement: supplementary_material [file attachment]

# SPREPE: A SPHERICAL GEOMETRY-AWARE POSITION EMBEDDING FOR VISION TRANSFORMERS

**Anonymous authors**

Paper under double-blind review

## ABSTRACT

Position embedding (PE) is a key mechanism that breaks the permutation symmetry of tokens in Transformer, introducing a spatial inductive bias that enables attention to model locality, distances, and directional relations. Spherical data arise in many scientific domains, most notably in astronomy and meteorology, where Vision Transformers is increasingly adopted for the ability to capture long-range dependencies. However, conventional PEs are designed for linear sequences and cannot faithfully capture the sphere’s non-Euclidean geometry. Furthermore, existing designs for encoding spherical positional information rely on additional network modules or specialized network architectures, which introduce extra parameters and computational overhead. These limitations motivate a geometry-aware and efficient embedding scheme that fully exploits spherical structure to advance Transformer-based modeling on the sphere. We introduce **Spherical Reflection Position Embedding (SpRePE)**, a lightweight method efficiently leveraging spherical positional information for Vision Transformer. SpRePE encodes the absolute position on the sphere using a Householder matrix and incorporates the explicit relative position dependency into the attention formulation, achieving both high computational efficiency and high accuracy without requiring substantial additional parameters and modifications to the overall model architecture. We evaluate SpRePE on representative tasks, including spherical image classification and global weather forecasting. SpRePE consistently outperforms well-known baselines including APE, RPE, ALiBi and RoPE. These results indicate that SpRePE offers an efficient and broadly applicable position embedding scheme for Transformer models on the sphere.

## 1 INTRODUCTION

The Transformer architecture (Vaswani et al., 2017) was first introduced for natural language processing tasks and has since demonstrated a strong non-linear modeling capacity across numerous benchmarks (Vaswani et al., 2017; Radford et al., 2019; Devlin et al., 2019). Its vision counterpart, Vision Transformer (ViT), applies the same attention principle to sequences of image patches and achieves competitive or superior performance compared to convolutional neural networks, particularly for modeling long-range dependencies (Dosovitskiy et al., 2021; Liu et al., 2021).

Since the attention mechanism itself is position-agnostic, a Transformer model without position embedding (PE) treats all tokens as interchangeable, severely limiting representational ability (Yun et al., 2020). Injecting positional information is therefore indispensable for capturing token order or spatial layout, and preserving accuracy for Transformer (Vaswani et al., 2017; Shaw et al., 2018; Devlin et al., 2019; Lan et al., 2020) as well as Vision Transformer (Dosovitskiy et al., 2021; Heo et al., 2024).

Spherical data are widely used across many scientific domains, including geoscience (Alken et al., 2021), astronomy (Planck Collaboration et al., 2020), and meteorology (Hersbach et al., 2018). In recent years, Transformer-based models have also been introduced to address problems involving spherical data, with notable examples including Pangu-Weather (Bi et al., 2023) for weather forecasting and WenHai (Cui et al., 2025) for oceanography.

Unlike planar Cartesian coordinates, the spherical domain is non-Euclidean. Spherical coordinates obey periodic boundary conditions in longitude and exhibit coordinate singularities at the poles.

054 These properties pose specific challenges for positional encoding when applying Vision Transform-  
055 ers on the sphere.

056 Prior works have explored various PE strategies. One class relies on *absolute* position embeddings  
057 (APE), which can be either fixed (Vaswani et al., 2017) or learnable (Devlin et al., 2019; Lan et al.,  
058 2020; Clark et al., 2020). These schemes add positional information at the stem to break permutation  
059 symmetry. However, APE does not directly encode relative positional information and provides little  
060 geometry-aware inductive bias; such relations must be learned implicitly. A second class employs  
061 *relative* position embedding (RPE), which provides positional information based on token-to-token  
062 offsets and encodes it into the attention mechanism (Shaw et al., 2018; Huang et al., 2020; Ke et al.,  
063 2021; He et al., 2021; Press et al., 2022; Su et al., 2024). These schemes are mainly designed  
064 for planar grids; therefore, they may fail to faithfully represent geodesic relations under spherical  
065 periodicity and singularity. Moreover, several spherical PE methods incorporate positional informa-  
066 tion via custom operators (Yun et al., 2023) or additional neural modules (Mai et al., 2023), which  
067 increases model size and training overhead.

068 To address the above challenges and the shortcomings of current PEs, we introduce SpRePE, a  
069 reflection-matrix-based spherical position embedding scheme for Vision Transformer. SpRePE en-  
070 codes absolute positions on the sphere using reflection matrices and directly injects an explicit spher-  
071 ical relative-position term into the attention mechanism. The reflection-matrix formulation endows  
072 this relative term with a clear geometric interpretation, thereby respecting spherical geometric con-  
073 straints. SpRePE adopts a drop-in design that operates solely within the attention module, requiring  
074 neither substantial additional parameters nor modifications to the overall model architecture. In  
075 practice, the extra computation overhead is negligible compared with the attention computation.

076 To validate the effectiveness of SpRePE, we conduct experiments on representative spherical tasks:  
077 spherical image classification and global weather forecasting. The experiments are implemented  
078 within the same Vision Transformer framework to ensure fair and consistent evaluation. We com-  
079 pare SpRePE with well-known position embedding methods including APE, RPE, ALiBi and RoPE.  
080 The results show that SpRePE performs strongly across tasks, with particularly pronounced advan-  
081 tages when conventional position embedding are affected by geometric distortions. These results  
082 demonstrate that SpRePE is an efficient and practical position embedding method for attention-  
083 based networks in spherical modeling tasks.

## 084 2 PRELIMINARY

085 Consider a standard self-attention layer with input sequence  $\mathbf{X} = [x_1, x_2, \dots, x_n]^\top \in \mathbb{R}^{n \times d}$ , where  
086  $n$  is the number of tokens and  $d$  is the hidden dimension. The attention output is computed as:

$$087 f(\mathbf{X}) = \text{Attention}(\mathbf{X}) = \text{softmax} \left( \frac{\mathbf{Q}\mathbf{K}^\top}{\sqrt{d}} \right) \mathbf{V},$$

088 where  $\mathbf{W}^{t:t \in \{\mathbf{Q}, \mathbf{K}, \mathbf{V}\}} \in \mathbb{R}^{d \times d}$  are parameter matrices,  $\mathbf{Q} = \mathbf{X}\mathbf{W}^\mathbf{Q}$ ,  $\mathbf{K} = \mathbf{X}\mathbf{W}^\mathbf{K}$ , and  $\mathbf{V} = \mathbf{X}\mathbf{W}^\mathbf{V}$ .

089 Without position embedding, the self-attention layer is permutation-equivariant, meaning for any  
090 permutation  $\sigma \in S_n$ , we have

$$091 f(P_\sigma \mathbf{X}) = P_\sigma f(\mathbf{X}),$$

092 where  $P_\sigma$  is the permutation matrix corresponding to  $\sigma$ . This symmetry makes it impossible for the  
093 model to distinguish positions of tokens.

094 **Absolute position embedding (APE) & Relative position embedding (RPE)** To break this sym-  
095 metry, two families of position embedding schemes are widely adopted: absolute position embed-  
096 ding (APE) and relative position embedding (RPE). Implementation details of both families are  
097 deferred to the Appendix B. Given their practicality and prevalence, we adopt representative imple-  
098 mentations from each family as baselines in our experiments.

099 **Rotary position embedding (RoPE)** Although RPE incorporates relative positional information,  
100 its direct application to the attention mechanism limits its influence on  $q$  and  $k$ , thereby constrain-  
101 ing its effectiveness. Additionally, compare to APE, RPE incurs significant higher computational  
102 cost.

cost. Motivated by these limitations, RoPE encodes positional information by applying rotations to  $q$  and  $k$ , such that their inner product depends only on relative offsets, while introducing negligible overhead relative to standard attention. Specifically, in the one-dimensional case, let the  $n$ -th query and the  $m$ -th key be denoted by  $q_n, k_m \in \mathbb{R}^d$ . RoPE provides a solution to the constraint  $\langle f(q_n, n), f(k_m, m) \rangle = g(q_n, k_m, n - m)$ , i.e. the inner product after position embedding depends only on the relative offset  $n - m$ .

RoPE is defined as  $\text{RoPE}(q_n, n) = R_n \circ \hat{q}_n$ , where  $\circ$  denotes element-wise multiplication. The complex vector  $\hat{q}_n \in \mathbb{C}^{d/2}$  is obtained by pairing consecutive real dimensions:

$$\text{Re}(\hat{q}_{n,t}) = q_{n,2t}, \text{Im}(\hat{q}_{n,t}) = q_{n,2t+1}, t = 0, \dots, \frac{d}{2} - 1.$$

The rotary factor  $R_n \in \mathbb{C}^{d/2}$  is given by  $R_{n,t} = e^{i\theta_t}$ , with fixed frequencies  $\theta_t$  independent of  $n$ .

In natural language processing, RoPE has been shown to perform well and to excel at length extrapolation. Two extensions are commonly adopted in Vision Transformers:

**(i) Axial–frequency RoPE.** This extension keeps each coordinate is encoded independently:

$$R_{n,2t} = e^{i x_n \theta_t}, R_{n,2t+1} = e^{i y_n \theta_t}, \quad t = 0, \dots, \frac{d}{4} - 1.$$

The axial variant is a natural extension of 1D RoPE to two dimensions: it applies independent 1D RoPE along the height and width axes to span a 2D grid. This design is simple to implement, maintains a bijection between rotary phase and spatial location, and has become the de facto standard; we therefore adopt it as the state-of-the-art baseline in our experiments.

**(ii) Mixed–frequency RoPE.** For a token located at  $p_n = (x_n, y_n)$ , the rotary factor is defined as

$$R_{n,t} = \exp\left\{i(x_n \theta_t^x + y_n \theta_t^y)\right\}, \quad t = 0, \dots, \frac{d}{2} - 1.$$

This formulation blends the horizontal and vertical offsets, enabling the model to consider both directions simultaneously. However, like the axial variant, it operates under a planar parameterization and does not endow any sphere-specific properties.

All relative position embeddings above model displacement solely through index differences. While this assumption is adequate on a planar grid, it fails on a sphere due to the non-Euclidean geometry:

- **Equator vs. pole.** Under a Plate Carrée projection, a longitudinal difference of  $180^\circ$  spans half the globe at the equator but collapses to an infinitesimal arc near the poles.
- **Prime-meridian wrap-around.** Near the prime meridian, two points with the maximal longitudinal index difference appear distant in the projection, yet are almost coincident on the sphere.

Hence, index-based relative position embeddings cannot faithfully capture spherical distances, motivating our geometry-aware positional embedding for spherical data.

### 3 METHOD

We propose **Spherical Reflection Position embedding (SpRePE)**, a spherical position embedding scheme, in which *absolute* embedding results inform *relative* information through the inner product of encoded queries and keys. In other words, the embedding algorithm only requires the position of a single token at embedding time, and allows the attention mechanism to reflect the pairwise relative positional information between any two tokens.

More concretely, when a Vision Transformer processes spherical data, let  $p_1 = (\theta_{p_1}, \phi_{p_1})$  and  $p_2 = (\theta_{p_2}, \phi_{p_2})$  be two arbitrary points on the unit sphere, where  $\theta \in [-\pi, \pi]$  and  $\phi \in [0, 2\pi)$  denote longitude and latitude, respectively. SpRePE provides a solution  $f(\cdot, \cdot)$  such that, for query vector  $q$  and key vector  $k$ ,

Table 1: Comparison of position embedding schemes.

| Property          | APE        | RPE             | RoPE          | SpRePE        |
|-------------------|------------|-----------------|---------------|---------------|
| Where applied     | stem stage | attention score | $q/k$ vectors | $q/k$ vectors |
| Compute-efficient | ✓          | ×               | ✓             | ✓             |
| Relative info     | ×          | ✓               | ✓             | ✓             |
| Sphere-aware      | ×          | ×               | ×             | ✓             |

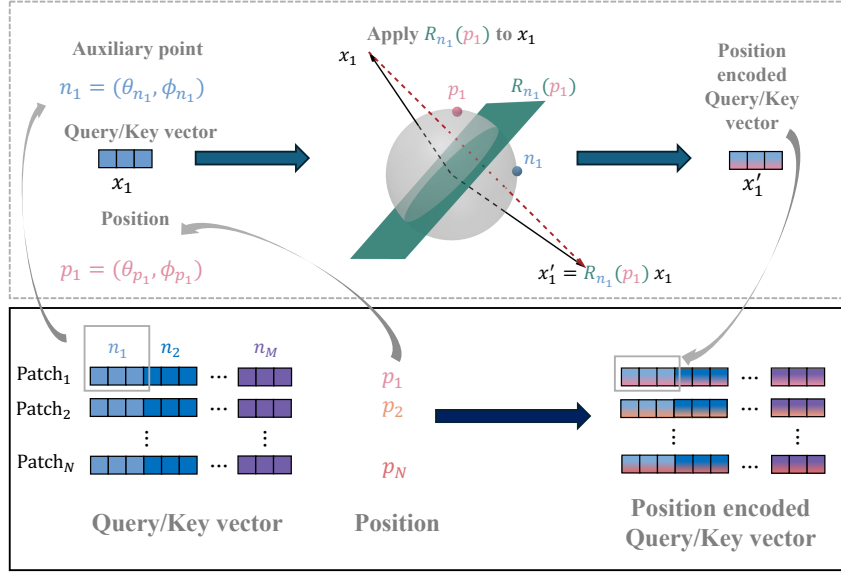

Figure 1: **Implementation of Spherical Reflection Position embedding (SpRePE)**. The embedding space is partitioned into  $d/3$  disjoint 3D subspaces, each processed independently by SpRePE. For each subspace, we preselect an auxiliary point  $n_m = (\theta_{n_m}, \phi_{n_m})$  on the unit sphere. Given a patch located at  $p_i = (\theta_{p_i}, \phi_{p_i})$ , the Householder reflection matrix  $R_{n_m}(p_i)$  is applied to the corresponding query/key vector  $x_i$ , yielding the position-encoded vector  $x'_i = R_{n_m}(p_i) x_i$ . This scheme ensures that the embedding stage relies solely on the *absolute* coordinates of  $p_i$ . The upper part of the figure illustrates the special case with  $m = 1, i = 1$ .

$$\langle f(q, p_1), f(k, p_2) \rangle = g(q, k, \text{pos}(p_1, p_2)), \quad (1)$$

where  $\text{pos}(p_1, p_2)$  denotes a function of the *relative* position between  $p_1$  and  $p_2$  on the sphere. Table 1 compares SpRePE with the well-known PE schemes through several key characteristics. Its RoPE-like design enables the incorporation of spherical relative positional information while keeping the computational overhead negligible.

### 3.1 DERIVATION OF SPREPE UNDER 3D

We begin with a special case with a dimensions  $d = 3$ . Because the admissible choices of the pair  $(f, g)$  satisfying Eq. 1 admit large degrees of freedom, we have ample room to impose additional structure. We first convert the spherical coordinates to Cartesian form for convenience,  $p_1 = (\sin \theta_{p_1} \cos \phi_{p_1}, \sin \theta_{p_1} \sin \phi_{p_1}, \cos \theta_{p_1})$ ,  $p_2 = (\sin \theta_{p_2} \cos \phi_{p_2}, \sin \theta_{p_2} \sin \phi_{p_2}, \cos \theta_{p_2})$ . We may conveniently impose the constraint that  $f$  acts as multiplication by an orthogonal matrix; that is,  $f(q, n) = R(n)q$ . Even under this constraint,  $f$  remains sufficiently flexible.

Note that

$$g(q, k, \text{pos}(p_1, p_2)) = \langle f(q, p_1), f(k, p_2) \rangle = q^\top R(p_1)^\top R(p_2) k = q^\top R(p_1, p_2) k \quad (2)$$

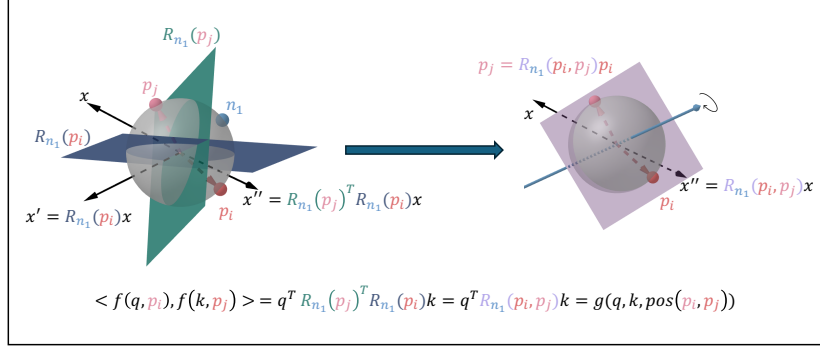

Figure 2: **Illustration of how SPREPE encodes relative position information through absolute reflections and an inner-product ( $d = 3$ ).** The Householder matrix is applied to the query/key vector  $x_i$ , yielding the position-encoded vector  $x'_i = R_{n_1}(p_i) x_i$ . Given two patches  $p_i$  and  $p_j$ , the product  $R_{n_1}(p_i)^T R_{n_1}(p_j)$  is a rotation whose axis equals the normal of the plane defined by  $n$ ,  $p_1$ , and  $p_2$ . Consequently, the inner product  $\langle f(q, p_1), f(k, p_2) \rangle = q^T R_n(p_1)^T R_n(p_2) k$  depends only on  $q$ ,  $k$ , and the relative position  $\text{pos}(p_1, p_2)$ , thereby realizing Eq.1 without ever observing both coordinates simultaneously.

where  $R(p_1, p_2) = R(p_1)^T R(p_2)$ . Because both  $R(p_1)$  and  $R(p_2)$  are orthogonal with  $\det R(p_1) = \det R(p_2)$ , we have  $\det R(p_1, p_2) = \det R(p_1) \det R(p_2) = 1$ . Hence,  $R(p_1, p_2)$  is itself an orthogonal matrix with unit determinant, i.e. a three-dimensional rotation.

We impose

$$p_1^T R(p_1, p_2) p_2 = p_1^T R(p_1)^T R(p_2) p_2 = p_1^T p_1 = p_2^T p_2 = 1. \quad (3)$$

Accordingly,  $R(p_1, p_2)$  is the rotation matrix that maps  $p_2$  onto  $p_1$ . The matrix  $R(p_1, p_2)$  still carries one degree of freedom—its rotation angle  $\gamma$ . Once the angle is chosen, with  $\gamma \in [\arccos\langle p_1, p_2 \rangle, \pi]$ , the rotation axis can be chosen from at most two alternatives.

However, we cannot parameterize  $R(p_1, p_2)$  by its rotation angle, because evaluating that angle requires simultaneous knowledge of both  $p_1$  and  $p_2$ , whereas the embedding scheme has access to only one of the two points at a time. Consequently, the rotation angle is not a suitable independent variable.

A more reasonable choice is to introduce an auxiliary point  $n$ . For arbitrary point  $p$  on the sphere, let  $R_n(p)$  denote the Householder reflection that mirrors  $p$  onto  $n$ . that is, the unique orthogonal matrix satisfying  $R_n(p) n = p$  and  $R_n(p)^T = R_n(p)^{-1}$  with  $\det R_n(p) = -1$ . This matrix serves as the fundamental building block of our spherical position embedding.

Once  $n$  is fixed, the matrix  $R(p_1, p_2)$  becomes fully determined. Noticed that the normal vector of the plane defined by  $n$ ,  $p_1$ , and  $p_2$  is exactly the eigenvector of both  $R_n(p_1)$  and  $R_n(p_2)$ , and therefore serves as the rotation axis of the matrix  $R_n(p_1)^T R_n(p_2)$ . A more complete proof is provided in the Appendix C. Given this axis, the rotation angle is uniquely defined as the ratio of arc length between  $p_1$  and  $p_2$  along the circle obtained by intersecting that plane with the sphere to its radius.

The degree of freedom associated with  $n$  is therefore redundant: any two choices of  $n$  that generate the same plane yield identical embedding. We exploit this observation to avoid double-counting during embedding. Because the grid is fixed *a priori*, we simply enforce that, for every pair  $(p_1, p_2)$ , any two auxiliary points  $n_1$  and  $n_2$  must define distinct sections; Under this constraint, distinct choices of  $n$  produce distinct embedding results.

It is worth emphasizing that the proposed embedding scheme imposes no assumptions on the grid: it is equally applicable to cubed-sphere as well as latitude–longitude discretizations. Likewise, it places no restrictions on the backbone architecture; the only requirement is the presence of an attention mechanism.

We next derive the explicit form of  $R_n(p_1)$ . Let  $p_1, n$  be two unit vectors on the sphere. The Householder reflection that maps  $p_1$  onto  $n$  is  $R_n(p_1) = I - 2vv^T$ ,  $v = \frac{n-p_1}{\|n-p_1\|} = (v_1, v_2, v_3)^T$ .

### 3.2 GENERAL FORM

In the general setting where the embedding dimension is a multiple of three, we partition the  $d$ -dimensional space into  $M = d/3$  three-dimensional subspaces and apply an independent reflection to each. Formally, the spherical position embedding acts as

$$f(x, p) = R(p)x, R(p) = \text{diag}(R_{n_1}(p), R_{n_2}(p), \dots, R_{n_M}(p)). \quad (4)$$

Each  $R_{n_i}(p)$  is the Householder matrix that mirrors  $p$  onto the auxiliary point  $n_i$ .

Distinct choices of the auxiliary points  $\{n_i\}_{i=1}^M$  therefore yield a family of block-diagonal reflection matrices that act independently on disjoint triplets of feature dimensions.

Taking the advantage of the sparsity of  $R(p)$  in Eq. 4, we can avoid computing the matrix-vector product between  $R(p)$  and  $x \in \mathbb{R}^d$ ; instead, we use an element-wise multiplication for a more efficient computation. Specifically, the form is

$$R(p)x = \begin{bmatrix} 1 - 2v_{(n_1,p)_1}^2 \\ 1 - 2v_{(n_1,p)_2}^2 \\ 1 - 2v_{(n_1,p)_3}^2 \\ 1 - 2v_{(n_2,p)_1}^2 \\ 1 - 2v_{(n_2,p)_2}^2 \\ 1 - 2v_{(n_2,p)_3}^2 \\ \vdots \\ 1 - 2v_{(n_M,p)_1}^2 \\ 1 - 2v_{(n_M,p)_2}^2 \\ 1 - 2v_{(n_M,p)_3}^2 \end{bmatrix} \circ \begin{bmatrix} x_1 \\ x_2 \\ x_3 \\ x_4 \\ x_5 \\ x_6 \\ \vdots \\ x_{d-2} \\ x_{d-1} \\ x_d \end{bmatrix} - \begin{bmatrix} 2v_{(n_1,p)_1}v_{(n_1,p)_2} \\ 2v_{(n_1,p)_2}v_{(n_1,p)_3} \\ 2v_{(n_1,p)_3}v_{(n_1,p)_1} \\ 2v_{(n_2,p)_1}v_{(n_2,p)_2} \\ 2v_{(n_2,p)_2}v_{(n_2,p)_3} \\ 2v_{(n_2,p)_3}v_{(n_2,p)_1} \\ \vdots \\ 2v_{(n_M,p)_1}v_{(n_M,p)_2} \\ 2v_{(n_M,p)_2}v_{(n_M,p)_3} \\ 2v_{(n_M,p)_3}v_{(n_M,p)_1} \end{bmatrix} \circ \begin{bmatrix} x_2 \\ x_3 \\ x_1 \\ x_5 \\ x_6 \\ x_4 \\ \vdots \\ x_{d-1} \\ x_d \\ x_{d-2} \end{bmatrix} - \begin{bmatrix} 2v_{(n_1,p)_1}v_{(n_1,p)_3} \\ 2v_{(n_1,p)_2}v_{(n_1,p)_1} \\ 2v_{(n_1,p)_3}v_{(n_1,p)_2} \\ 2v_{(n_2,p)_1}v_{(n_2,p)_3} \\ 2v_{(n_2,p)_2}v_{(n_2,p)_1} \\ 2v_{(n_2,p)_3}v_{(n_2,p)_2} \\ \vdots \\ 2v_{(n_M,p)_1}v_{(n_M,p)_3} \\ 2v_{(n_M,p)_2}v_{(n_M,p)_1} \\ 2v_{(n_M,p)_3}v_{(n_M,p)_2} \end{bmatrix} \circ \begin{bmatrix} x_3 \\ x_1 \\ x_2 \\ x_6 \\ x_4 \\ x_5 \\ \vdots \\ x_d \\ x_{d-2} \\ x_{d-1} \end{bmatrix} \quad (5)$$

where  $\circ$  denotes the element-wise multiplication.

### 3.3 REDUCING DENSITY-INDUCED DEGENERACY VIA PARTIAL SPRePE

When position embedding depends solely on token’s location on the sphere, non-uniform token distributions may cause *representation degeneracy*: tokens concentrated in certain regions receive highly similar positional features, making  $Q/K$  poorly conditioned and reducing the effective rank. To avoid this, we adopt a simple strategy that applies SpRePE only to a subset of the  $Q/K$  elements:

$$Q = (1 - M) \circ Q_0 + M \circ \text{SpRePE}(Q_0, p), \quad K = (1 - M) \circ K_0 + M \circ \text{SpRePE}(K_0, p),$$

where  $Q_0$  and  $K_0$  are the vanilla projections (not identical across patches) and  $M \in \{0, 1\}^d$  is a binary mask applied along the hidden dimension.

We consider two mask designs. (i) **Fixed-ratio mask**: SpRePE is applied on a constant fraction  $\rho$  of elements (e.g.,  $\rho = 7/8$ ), i.e.,  $M(j) = \mathbf{1}\{j \leq \lfloor \rho d \rfloor\}$ . (ii) **Density-adaptive mask**: let  $\rho_i \in [\rho_{\min}, \rho_{\max}]$  depend on token  $i$ ’s local sampling density. For equirectangular grids, we use the area weight  $a(\phi_i) = \cos \phi_i$  ( $\phi_i \in [-\pi/2, \pi/2]$ , proportional to solid-angle per token) and set  $\rho_i = \text{clip}(\rho_{\max} a(\phi_i), \rho_{\min}, \rho_{\max})$ . This gating preserves SpRePE’s geometry-aware bias in sparsely sampled regions while preventing over-aggregation in dense areas.

### 3.4 COMPUTATIONAL OVERHEAD

Table 2 compares the extra computation cost introduced by each position embedding scheme. We analyze a generic ViT with  $L$  layers, a hidden dimension of  $d$ ,  $h$  attention heads, and an input batch of  $B$  tensor, each represented by  $N=H \times W$  patch tokens. Only leading-order terms are reported; constants and non-dominant factors are omitted for clarity.

Compared to well-known position embedding schemes, RPE introduces substantially higher computational and memory overhead. This is primarily due to its explicit construction of  $N \times N$  attention

Table 2: Asymptotic overhead of inference for various position embeddings.

| PE scheme     | Time Complexity       | Space Complexity     |
|---------------|-----------------------|----------------------|
| APE           | $\mathcal{O}(BNd)$    | $\mathcal{O}(Nd)$    |
| RPE           | $\mathcal{O}(BhN^2L)$ | $\mathcal{O}(hN^2L)$ |
| RoPE          | $\mathcal{O}(BNdL)$   | $\mathcal{O}(NdL)$   |
| <b>SpRePE</b> | $\mathcal{O}(BNdL)$   | $\mathcal{O}(NdL)$   |

bias matrices for each head in every layer, resulting in both computational and memory complexity that scales quadratically with the sequence length of  $N$ . Such overhead becomes increasingly prohibitive in high-resolution settings, presenting a critical bottleneck when scaling to high resolution weather forecasting tasks.

In contrast, APE introduces only a one-time overhead during the input embedding stage, with both its time complexity and memory usage growing linearly with the sequence length of  $N$ . Since the dominant attention operations ( $QK^\top$  and  $\text{softmax}(\cdot)V$ ) scale as  $\mathcal{O}(N^2d/h + Nd^2)$  in time and  $\mathcal{O}(hN^2 + Nd)$  in memory, this cost is negligible relative to the overall computation of the ViT backbone. Similarly, RoPE and SpRePE apply positional encoding to each token at every layer, with overhead that scales linearly with the sequence length of  $N$ , hidden dimension  $d$ , and number of layers  $L$ . Notably, despite introducing stronger geometric constrain through reflections, SpRePE maintains the same asymptotic complexity as RoPE.

This computational efficiency enables SpRePE to encode relative positional information without relying on costly attention bias matrices. As a result, it provides an effective balance between scalability and expressiveness, making it particularly well-suited for tasks defined on sphere.

## 4 EXPERIMENT

We integrate SpRePE into a standard ViT (Dosovitskiy et al., 2021) and compare performance by replacing only the PE under identical hyperparameter settings. We evaluate SpRePE on representative tasks: spherical image classification on Spherical MNIST (Esteves et al., 2020) and weather forecasting on ERA5 (Hersbach et al., 2018). The baselines include No Position Embedding (NoPE), APE (Dosovitskiy et al., 2021), RPE (Liu et al., 2021), ALiBi (Fuller et al., 2023), and RoPE (Heo et al., 2024). In addition, to assess the effect of our degeneracy-mitigation strategy, we report two collaborative variants: **SpRePE(F Mask)** and **SpRePE(A Mask)**, which respectively use a fixed-ratio mask and a density-adaptive mask. The results show that SpRePE performs remarkable across tasks, highlighting its advantages for spherical data processing.

### 4.1 SPHERICAL IMAGE CLASSIFICATION

We evaluate SpRePE on spherical image classification using the Spherical MNIST dataset, which places handwritten digits near the South Pole to stress correct handling of spherical geometry. Model and training hyper-parameters are provided in the Appendix D. Table 3 reports Top-1 accuracy on the test set, keeping the ViT backbone identical across methods while varying only the PE scheme.

The result shows that SpRePE(F Mask) achieves the highest Top-1 accuracy (96.74%), followed by SpRePE(A Mask) (96.32%) and APE (96.29%). The Fixed-ratio mask variant improves over RoPE by +0.88 pp and over ALiBi by +10.05 pp, under identical backbones and hyper-parameters.

### 4.2 WEATHER FORECASTING

We verify SpRePE in Weather Forecasting on ERA5 dataset (Hersbach et al., 2018). Due to the limitation of resource, we train our models on a subset of atmospheric variables, sub-sampled at a temporal frequency of 6 hours and  $128 \times 256$  spatial resolution of the ERA5 dataset. The input sample has 70 channels correspond to the surface and upper-air variables at different vertical layers. The variables used are listed in Appendix D.

Table 3: Spherical MNIST Top-1 accuracy (%) on test set. **Bold** denotes the best score; underline marks the second best. The same convention is used throughout unless otherwise noted.

| NoPE  | APE   | RPE   | ALiBi | RoPE  | SpRePE | SpRePE(F Mask) | SpRePE(A Mask) |
|-------|-------|-------|-------|-------|--------|----------------|----------------|
| 78.81 | 96.29 | 74.05 | 86.69 | 95.86 | 96.04  | <b>96.74</b>   | <u>96.32</u>   |

Table 4: Auto-regressive forecasting results on the ERA5 dataset using different position embedding schemes. Performance is evaluated by Anomaly Correlation Coefficient (ACC, higher is better). We measure ACC at the 4th(+24h), 20th (+120h) and 40th (+240h) steps.

| PE scheme      | ACC at 24h $\uparrow$ |               |               | ACC at +120h $\uparrow$ |               |               | ACC at +240h $\uparrow$ |               |               |
|----------------|-----------------------|---------------|---------------|-------------------------|---------------|---------------|-------------------------|---------------|---------------|
|                | Z500                  | T2M           | T850          | Z500                    | T2M           | T850          | Z500                    | T2M           | T850          |
| NoPE           | 0.9931                | 0.9632        | 0.9755        | 0.8199                  | 0.8251        | 0.8044        | 0.5286                  | 0.6767        | 0.5770        |
| APE            | 0.9954                | 0.9746        | 0.9795        | 0.8818                  | 0.9087        | 0.8653        | 0.5971                  | 0.8119        | 0.6539        |
| RPE            | 0.9963                | 0.9659        | 0.9782        | 0.9000                  | 0.8560        | 0.8636        | 0.6037                  | 0.7260        | 0.6377        |
| ALiBi          | 0.9958                | 0.9649        | 0.9780        | 0.8875                  | 0.8533        | 0.8535        | 0.5953                  | 0.7267        | 0.6398        |
| RoPE           | <b>0.9971</b>         | 0.9683        | <u>0.9810</u> | <b>0.9172</b>           | 0.8741        | 0.8811        | 0.6215                  | 0.7502        | 0.6591        |
| SpRePE         | 0.9964                | 0.9661        | 0.9788        | 0.9089                  | 0.8722        | 0.8736        | 0.6144                  | 0.7557        | 0.6587        |
| SpRePE(F Mask) | <u>0.9965</u>         | <b>0.9758</b> | <b>0.9813</b> | <u>0.9121</u>           | <b>0.9230</b> | <b>0.8886</b> | <b>0.6333</b>           | <b>0.8258</b> | <b>0.6783</b> |
| SpRePE(A Mask) | 0.9964                | <u>0.9754</u> | 0.9809        | 0.9110                  | <u>0.9226</u> | <u>0.8882</u> | <u>0.6237</u>           | 0.8168        | <u>0.6705</u> |

We use 6 years of ERA5 data (2015-2020): 2015-2018 are used for training, 2019 is used for validation, and 2020 is held out as out-of-sample test set. During training, the network’s input is ERA5 fields at time  $t$  and is optimized to predict the fields at  $t + 6$  h, with geometry-weighted L2 Loss. For validation and testing, the model is initialized with the analysis fields at  $t = 0$  and then run auto-regressively for 40 steps, producing forecasts at lead times  $+6$  h,  $+12$  h,  $\dots$ ,  $+240$  h.

Table 4 summarizes auto-regressive forecasting results on key variables, including geopotential at 500hPa (Z500), temperature at 850hPa (T850) and temperature at 2m above surface (T2M). At +24h, RoPE attains the best ACC on Z500, whereas **SpRePE(F Mask)** is highest on T2M and T850; **SpRePE(A Mask)** is the runner-up on both. For long-range skill, at +120h **SpRePE(F Mask)** widens the gap over RoPE on T2M and T850 while remaining slightly lower on Z500; by +240h it surpasses RoPE across all variables, indicating that SpRePE’s advantage grows from +24h to +120h and culminates in a complete overtake at +240h. We hypothesize that spherical geometry has limited impact at the first prediction step, where a planar or grid approximation is adequate, and that its importance increases as the lead time grows. Figure 3 reports the average difference in absolute relative error between RoPE and SpRePE(F Mask) on the test set after 40-step auto-regressive inference; SpRePE(F Mask) exhibits noticeably lower error than RoPE near the pole. By injecting a geometry-aware bias, our method preserves spatial coherence at long lead times and consequently yields higher ACC.

To further assess the generalization of SpRePE, we evaluate robustness to input rotations without retraining: we apply a rigid rotation around the axis normal to the prime-meridian plane. Fig. 4 reports the one-step RMSE. Across all three variables, RMSE increases with the rotation angle. For Z500 and T850, SpRePE maintains lower error than RoPE at all angles shown. For T2m, RoPE is slightly better at very small rotations (up to about  $\pi/8$ ), but SpRePE overtakes it for larger rotations and the gap widens toward  $\pi/2$ . These results indicate that SpRePE generalizes more robustly under coordinate rotations, consistent with its geometry-aware design.

## 5 RELATED WORK

**Position embeddings for Vision Transformers** In vision tasks, positional information is commonly injected via absolute positional embeddings (APE) or relative positional biases (RPB) (Dosovitskiy et al., 2021; Liu et al., 2021), with lightweight variants such as LaPE (Yu et al., 2023) and ALiBi-style distance decay (Fuller et al., 2023). Rotary positional embeddings (RoPE) (Su et al., 2024) have also been adapted to vision—either as 1D rotations along token order (Jeevan & Sethi, 2022) or as 2D extensions applied axially (height/width) or in fused form (Fang et al., 2024; Heo et al., 2024). However, these designs assume Euclidean grids; when applied to equirectangular

432  
433  
434  
435  
436  
437  
438  
439  
440  
441  
442  
443

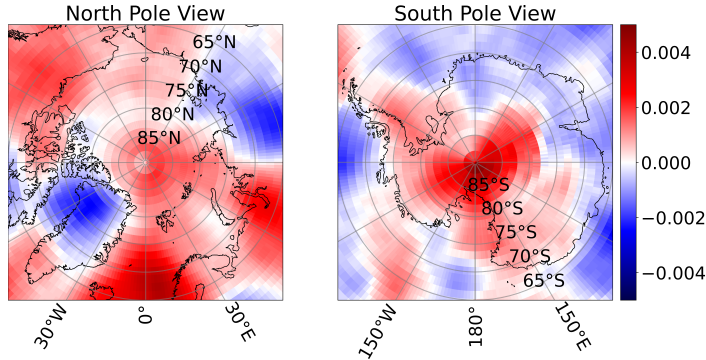

444  
445  
446  
447  
448

Figure 3: **Polar views of the average difference in absolute relative error between RoPE and SpRePE after 40-step autoregressive inference on the test set.** Each pixel shows  $\text{Avg}(\text{AbsRel}_{\text{RoPE}} - \text{AbsRel}_{\text{SpRePE}})$ , where  $\text{AbsRel} = \frac{|y_{\text{pred}} - y_{\text{gt}}|}{|y_{\text{gt}}|}$ . Red denotes regions where SpRePE is more accurate (lower AbsRel); blue indicates the opposite.

449  
450  
451  
452  
453  
454  
455  
456  
457  
458  
459  
460

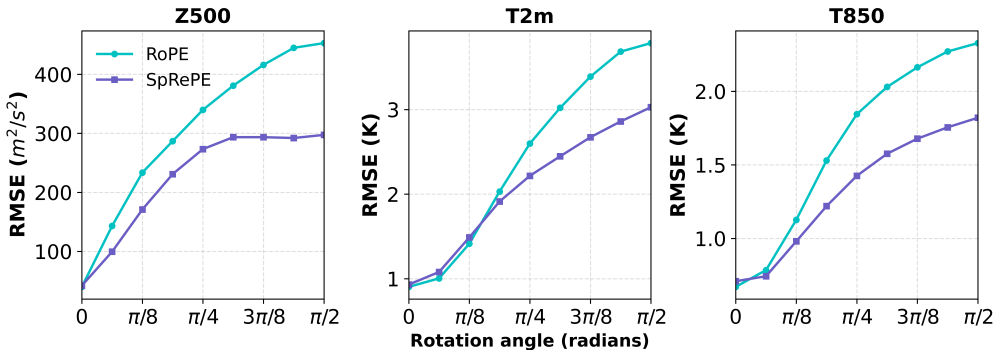

461  
462

Figure 4: **Robustness to rotated inputs on ERA5.** One-step RMSE versus rotation angle ( $0$  to  $\pi/2$ ) on test set. Inputs are rigidly rotated around the axis normal to the prime-meridian plane.

463  
464  
465

projections (ERP) of spherical data, they may introduce artifacts near the poles and along the prime-meridian seam (Chen et al., 2023; Lam et al., 2023; Hu et al., 2025).

466  
467  
468  
469  
470  
471  
472  
473  
474  
475  
476  
477

**Spherical positional representation** Beyond PEs, a separate line of work encodes spherical structure through specialized bases or architectural changes: classical DFS and multi-scale sinusoidal encodings (Orszag, 1974; Mai et al., 2020; 2022), spherical-harmonics embeddings (Rußwurm et al., 2024), and learnable mappers such as Sphere2Vec (Mai et al., 2023). Architecture-level adaptations include explicit latitude/longitude injection or HEALPix partitioning with local RPE (Yun et al., 2023; Carlsson et al., 2024). While effective, these approaches typically introduce custom operators or additional modules, increasing complexity and training cost. Our method, by contrast, remains a *drop-in positional embedding* that operates entirely inside standard attention, requiring no architectural modification.

478  
479  
480

## 6 CONCLUSION

481  
482  
483  
484  
485

We present **SpRePE**, a geometry-aware position embedding scheme for spherical data within attention mechanisms. SpRePE encodes absolute positions via reflection matrices and augments attention with an explicit relative-position term. This design only requires that the model include an attention mechanism and imposes no additional requirements on the model architecture. We evaluated SpRePE across multiple tasks, and the results demonstrate its effectiveness and advantages.

**Ethics Statement** This paper studies a positional embedding scheme for Transformers on spherical data. Our experiments use publicly available benchmark datasets; we did not collect new data and processed no personally identifiable information. All datasets are properly cited in the paper. We acknowledge that all authors of this work have read and commit to adhering to the ICLR Code of Ethics.

**Reproducibility statement** We provide an anonymous repository at <https://anonymous.4open.science/r/SpRePE-7357>, which contains (i) the core implementation used in our experiments and (ii) environment specifications required to run them. The repository further includes configuration files, scripts for data preparation, training and evaluation entry points.

Appendix D provides a complete description of the datasets used in the experiments. After downloading the raw data, the datasets can be generated using the scripts we provide in the repository.

## REFERENCES

- Patrick Alken, Erwan Thébault, Ciarán D Beggan, Hagay Amit, J Aubert, Julien Baerenzung, TN Bondar, WJ Brown, S Califf, A Chambodut, et al. International geomagnetic reference field: The thirteenth generation. *Earth, Planets and Space*, 73(1):49, 2021.
- Kaifeng Bi, Lingxi Xie, Hengheng Zhang, Xin Chen, Xiaotao Gu, and Qi Tian. Accurate medium-range global weather forecasting with 3d neural networks. *Nature*, 619(7970):533–538, 2023.
- Oscar Carlsson, Jan E. Gerken, Hampus Linander, Heiner Spieß, Fredrik Ohlsson, Christoffer Petersson, and Daniel Persson. Heal-swin: A vision transformer on the sphere. In *Proceedings of the IEEE/CVF Conference on Computer Vision and Pattern Recognition (CVPR)*, pp. 6067–6077, June 2024.
- Kang Chen, Tao Han, Junchao Gong, Lei Bai, Fenghua Ling, Jing-Jia Luo, Xi Chen, Leiming Ma, Tianning Zhang, Rui Su, Yuanzheng Ci, Bin Li, Xiaokang Yang, and Wanli Ouyang. Fengwu: Pushing the skillful global medium-range weather forecast beyond 10 days lead, 2023. URL <https://arxiv.org/abs/2304.02948>.
- Kevin Clark, Minh-Thang Luong, Quoc V. Le, and Christopher D. Manning. Electra: Pre-training text encoders as discriminators rather than generators, 2020. URL <https://arxiv.org/abs/2003.10555>.
- Yingzhe Cui, Ruohan Wu, Xiang Zhang, Ziqi Zhu, Bo Liu, Jun Shi, Junshi Chen, Hailong Liu, Shenghui Zhou, Liang Su, et al. Forecasting the eddying ocean with a deep neural network. *Nature Communications*, 16(1):2268, 2025.
- Jacob Devlin, Ming-Wei Chang, Kenton Lee, and Kristina Toutanova. Bert: Pre-training of deep bidirectional transformers for language understanding. In *Proceedings of the 2019 conference of the North American chapter of the association for computational linguistics: human language technologies, volume 1 (long and short papers)*, pp. 4171–4186, 2019.
- Alexey Dosovitskiy, Lucas Beyer, Alexander Kolesnikov, Dirk Weissenborn, Xiaohua Zhai, Thomas Unterthiner, Mostafa Dehghani, Matthias Minderer, Georg Heigold, Sylvain Gelly, Jakob Uszkoreit, and Neil Houlsby. An image is worth 16x16 words: Transformers for image recognition at scale, 2021. URL <https://arxiv.org/abs/2010.11929>.
- Carlos Esteves, Ameesh Makadia, and Kostas Daniilidis. Spin-weighted spherical cnns. In H. Larochelle, M. Ranzato, R. Hadsell, M.F. Balcan, and H. Lin (eds.), *Advances in Neural Information Processing Systems*, volume 33, pp. 8614–8625. Curran Associates, Inc., 2020. URL [https://proceedings.neurips.cc/paper\\_files/paper/2020/file/6217b2f7e4634fa665d31d3b4df81b56-Paper.pdf](https://proceedings.neurips.cc/paper_files/paper/2020/file/6217b2f7e4634fa665d31d3b4df81b56-Paper.pdf).
- Carlos Esteves, Jean-Jacques Slotine, and Ameesh Makadia. Scaling spherical CNNs. In Andreas Krause, Emma Brunskill, Kyunghyun Cho, Barbara Engelhardt, Sivan Sabato, and Jonathan Scarlett (eds.), *Proceedings of the 40th International Conference on Machine Learning*, volume 202 of *Proceedings of Machine Learning Research*, pp. 9396–9411. PMLR, 23–29 Jul 2023. URL <https://proceedings.mlr.press/v202/estevess23a.html>.

- 540 Yuxin Fang, Quan Sun, Xinggang Wang, Tiejun Huang, Xinlong Wang, and Yue Cao. Eva-02: A  
541 visual representation for neon genesis. *Image and Vision Computing*, 149:105171, September  
542 2024. ISSN 0262-8856. doi: 10.1016/j.imavis.2024.105171. URL [http://dx.doi.org/  
543 10.1016/j.imavis.2024.105171](http://dx.doi.org/10.1016/j.imavis.2024.105171).
- 544 Anthony Fuller, Koreen Millard, and James Green. Croma: Remote sensing representations with  
545 contrastive radar-optical masked autoencoders. *Advances in Neural Information Processing Sys-  
546 tems*, 36:5506–5538, 2023.
- 548 Pengcheng He, Xiaodong Liu, Jianfeng Gao, and Weizhu Chen. Deberta: Decoding-enhanced bert  
549 with disentangled attention, 2021. URL <https://arxiv.org/abs/2006.03654>.
- 550 Byeongho Heo, Song Park, Dongyoon Han, and Sangdoon Yun. Rotary position embedding for vision  
551 transformer, 2024. URL <https://arxiv.org/abs/2403.13298>.
- 553 Hans Hersbach, Bill Bell, Paul Berrisford, Gionata Biavati, András Horányi, Joaquín  
554 Muñoz Sabater, Julien Nicolas, Carole Peubey, Raluca Radu, Iryna Rozum, et al. Era5 hourly data  
555 on pressure levels from 1979 to present. <https://doi.org/10.24381/cds.bd0915c6>,  
556 2018. Accessed: 2025-07-05.
- 557 Yifan Hu, Fukang Yin, Weimin Zhang, Kaijun Ren, Junqiang Song, Kefeng Deng, and Di Zhang.  
558 Spherical multigrid neural operator for improving autoregressive global weather forecasting. *Sci-  
559 entific Reports*, 15(1):11522, 2025.
- 561 Zhiheng Huang, Davis Liang, Peng Xu, and Bing Xiang. Improve transformer models with better  
562 relative position embeddings. In Trevor Cohn, Yulan He, and Yang Liu (eds.), *Findings of the  
563 Association for Computational Linguistics: EMNLP 2020*, pp. 3327–3335, Online, November  
564 2020. Association for Computational Linguistics. doi: 10.18653/v1/2020.findings-emnlp.298.  
565 URL <https://aclanthology.org/2020.findings-emnlp.298/>.
- 566 Pranav Jeevan and Amit Sethi. Resource-efficient hybrid x-formers for vision. In *Proceedings of  
567 the IEEE/CVF winter conference on applications of computer vision*, pp. 2982–2990, 2022.
- 568 Guolin Ke, Di He, and Tie-Yan Liu. Rethinking positional encoding in language pre-training, 2021.  
569 URL <https://arxiv.org/abs/2006.15595>.
- 571 Remi Lam, Alvaro Sanchez-Gonzalez, Matthew Willson, Peter Wirnsberger, Meire Fortunato, Fer-  
572 ran Alet, Suman Ravuri, Timo Ewalds, Zach Eaton-Rosen, Weihua Hu, et al. Learning skillful  
573 medium-range global weather forecasting. *Science*, 382(6677):1416–1421, 2023.
- 574 Zhenzhong Lan, Mingda Chen, Sebastian Goodman, Kevin Gimpel, Piyush Sharma, and Radu Sori-  
575 cut. Albert: A lite bert for self-supervised learning of language representations, 2020. URL  
576 <https://arxiv.org/abs/1909.11942>.
- 578 Ze Liu, Yutong Lin, Yue Cao, Han Hu, Yixuan Wei, Zheng Zhang, Stephen Lin, and Baining Guo.  
579 Swin transformer: Hierarchical vision transformer using shifted windows. In *Proceedings of the  
580 IEEE/CVF international conference on computer vision*, pp. 10012–10022, 2021.
- 582 Gengchen Mai, Krzysztof Janowicz, Bo Yan, Rui Zhu, Ling Cai, and Ni Lao. Multi-scale rep-  
583 resentation learning for spatial feature distributions using grid cells, 2020. URL <https://arxiv.org/abs/2003.00824>.
- 585 Gengchen Mai, Krzysztof Janowicz, Yingjie Hu, Song Gao, Bo Yan, Rui Zhu, Ling Cai, and  
586 Ni Lao. A review of location encoding for geoai: methods and applications. *International  
587 Journal of Geographical Information Science*, 36(4):639–673, January 2022. ISSN 1362-  
588 3087. doi: 10.1080/13658816.2021.2004602. URL [http://dx.doi.org/10.1080/  
589 13658816.2021.2004602](http://dx.doi.org/10.1080/13658816.2021.2004602).
- 590 Gengchen Mai, Yao Xuan, Wenyun Zuo, Yutong He, Jiaming Song, Stefano Ermon, Krzysztof  
591 Janowicz, and Ni Lao. Sphere2vec: A general-purpose location representation learning over a  
592 spherical surface for large-scale geospatial predictions, 2023. URL [https://arxiv.org/  
593 abs/2306.17624](https://arxiv.org/abs/2306.17624).

- 594 Steven A Orszag. Fourier series on spheres. *Monthly weather review*, 102(1):56–75, 1974.  
595
- 596 Planck Collaboration, Aghanim, N., Akrami, Y., Arroja, F., Ashdown, M., Aumont, J., Baccigalupi,  
597 C., Ballardini, M., Banday, A. J., Barreiro, R. B., Bartolo, N., Basak, S., Battye, R., Benabed, K.,  
598 Bernard, J.-P., Bersanelli, M., Bielewicz, P., Bock, J. J., Bond, J. R., Borrill, J., Bouchet, F. R.,  
599 Boulanger, F., Bucher, M., Burigana, C., Butler, R. C., Calabrese, E., Cardoso, J.-F., Carron, J.,  
600 Casaponsa, B., Challinor, A., Chiang, H. C., Colombo, L. P. L., Combet, C., Contreras, D., Crill,  
601 B. P., Cuttaia, F., de Bernardis, P., de Zotti, G., Delabrouille, J., Delouis, J.-M., Désert, F.-X.,  
602 Di Valentino, E., Dickinson, C., Diego, J. M., Donzelli, S., Doré, O., Douspis, M., Ducout, A.,  
603 Dupac, X., Efstathiou, G., Elsner, F., Enßlin, T. A., Eriksen, H. K., Falgarone, E., Fantaye, Y.,  
604 Fergusson, J., Fernandez-Cobos, R., Finelli, F., Forastieri, F., Frailis, M., Franceschi, E., Frolov,  
605 A., Galeotta, S., Galli, S., Ganga, K., Génova-Santos, R. T., Gerbino, M., Ghosh, T., González-  
606 Nuevo, J., Górski, K. M., Gratton, S., Gruppuso, A., Gudmundsson, J. E., Hamann, J., Handley,  
607 W., Hansen, F. K., Helou, G., Herranz, D., Hildebrandt, S. R., Hivon, E., Huang, Z., Jaffe, A. H.,  
608 Jones, W. C., Karakci, A., Keihänen, E., Keskitalo, R., Kiiveri, K., Kim, J., Kisner, T. S., Knox,  
609 L., Krachmalnicoff, N., Kunz, M., Kurki-Suonio, H., Lagache, G., Lamarre, J.-M., Langer, M.,  
610 Lasenby, A., Lattanzi, M., Lawrence, C. R., Le Jeune, M., Leahy, J. P., Lesgourgues, J., Levrier,  
611 F., Lewis, A., Liguori, M., Lilje, P. B., Lilley, M., Lindholm, V., López-Cañiego, M., Lubin, P.  
612 M., Ma, Y.-Z., Macías-Pérez, J. F., Maggio, G., Maino, D., Mandolesi, N., Mangilli, A., Marcos-  
613 Caballero, A., Maris, M., Martin, P. G., Martinelli, M., Martínez-González, E., Matarrese, S.,  
614 Mauri, N., McEwen, J. D., Meerburg, P. D., Meinhold, P. R., Melchiorri, A., Mennella, A., Migli-  
615 accio, M., Millea, M., Mitra, S., Miville-Deschênes, M.-A., Molinari, D., Moneti, A., Montier, L.,  
616 Morgante, G., Moss, A., Mottet, S., Münchmeyer, M., Natoli, P., Nørgaard-Nielsen, H. U., Oxbor-  
617 row, C. A., Pagano, L., Paoletti, D., Partridge, B., Patanchon, G., Pearson, T. J., Peel, M., Peiris,  
618 H. V., Perrotta, F., Pettorino, V., Piacentini, F., Polastri, L., Polenta, G., Puget, J.-L., Rachen, J.  
619 P., Reinecke, M., Remazeilles, M., Renault, C., Renzi, A., Rocha, G., Rosset, C., Roudier, G.,  
620 Rubiño-Martín, J. A., Ruiz-Granados, B., Salvati, L., Sandri, M., Savelainen, M., Scott, D., Shel-  
621 lard, E. P. S., Shiraishi, M., Sirignano, C., Sirri, G., Spencer, L. D., Sunyaev, R., Suur-Uski, A.-S.,  
622 Tauber, J. A., Tavagnacco, D., Tenti, M., Terenzi, L., Toffolatti, L., Tomasi, M., Trombetti, T.,  
623 Valiviita, J., Van Tent, B., Vibert, L., Vielva, P., Villa, F., Vittorio, N., Wandelt, B. D., Wehus, I.  
624 K., White, M., White, S. D. M., Zacchei, A., and Zonca, A. Planck 2018 results - i. overview  
625 and the cosmological legacy of planck. *AA*, 641:A1, 2020. doi: 10.1051/0004-6361/201833880.  
626 URL <https://doi.org/10.1051/0004-6361/201833880>.
- 627 Ofir Press, Noah A. Smith, and Mike Lewis. Train short, test long: Attention with linear biases  
628 enables input length extrapolation, 2022. URL <https://arxiv.org/abs/2108.12409>.
- 629 Alec Radford, Jeffrey Wu, Rewon Child, David Luan, Dario Amodei, Ilya Sutskever, et al. Language  
630 models are unsupervised multitask learners. ' [https://cdn.openai.com/better-  
631 language-models/language\\_models\\_are\\_unsupervised\\_multitask\\_learners.pdf](https://cdn.openai.com/better-language-models/language_models_are_unsupervised_multitask_learners.pdf)', 2019. Accessed: 2025-07-04.
- 632 Marc Rußwurm, Konstantin Klemmer, Esther Rolf, Robin Zbinden, and Devis Tuia. Geographic  
633 location encoding with spherical harmonics and sinusoidal representation networks, 2024. URL  
634 <https://arxiv.org/abs/2310.06743>.
- 635 Peter Shaw, Jakob Uszkoreit, and Ashish Vaswani. Self-attention with relative position representa-  
636 tions, 2018. URL <https://arxiv.org/abs/1803.02155>.
- 637 Jianlin Su, Murtadha Ahmed, Yu Lu, Shengfeng Pan, Wen Bo, and Yunfeng Liu. Roformer:  
638 Enhanced transformer with rotary position embedding. *Neurocomputing*, 568:127063, 2024.  
639 ISSN 0925-2312. doi: <https://doi.org/10.1016/j.neucom.2023.127063>. URL [https://www.  
640 sciencedirect.com/science/article/pii/S0925231223011864](https://www.sciencedirect.com/science/article/pii/S0925231223011864).
- 641 Ashish Vaswani, Noam Shazeer, Niki Parmar, Jakob Uszkoreit, Llion Jones, Aidan N Gomez,  
642 Łukasz Kaiser, and Illia Polosukhin. Attention is all you need. *Advances in neural informa-  
643 tion processing systems*, 30, 2017.
- 644 Runyi Yu, Zhennan Wang, Yinhuai Wang, Kehan Li, Chang Liu, Haoyi Duan, Xiangyang Ji, and Jie  
645 Chen. Lape: Layer-adaptive position embedding for vision transformers with independent layer  
646 normalization. In *Proceedings of the IEEE/CVF International Conference on Computer Vision*,  
647 pp. 5886–5896, 2023.

648 Chulhee Yun, Srinadh Bhojanapalli, Ankit Singh Rawat, Sashank J. Reddi, and Sanjiv Kumar. Are  
649 transformers universal approximators of sequence-to-sequence functions?, 2020. URL <https://arxiv.org/abs/1912.10077>.

651  
652 Ilwi Yun, Chanyong Shin, Hyunku Lee, Hyuk-Jae Lee, and Chae Eun Rhee. Egformer: Equirect-  
653 angular geometry-biased transformer for 360 depth estimation, 2023. URL <https://arxiv.org/abs/2304.07803>.

## 656 A THE USE OF LARGE LANGUAGE MODELS

657  
658 According to the conference requirements, we acknowledge the use of large language models during  
659 manuscript preparation. Its contributions are translation, polishing, and general writing assistance.  
660 Authors take full responsibility for the content of this paper.

## 662 B IMPLEMENTATION DETAILS OF POSITION EMBEDDINGS

### 664 B.1 ABSOLUTE POSITION EMBEDDING (APE)

665  
666 Given an input sequence  $\mathbf{X} = [x_1, \dots, x_n] \in \mathbb{R}^{n \times d}$ , APE adds a unique positional vector  $e_k^{\text{APE}}$  to  
667 each token at the stem stage:

$$668 \tilde{f}(x_1, \dots, x_n) = f(x_1 + e_1^{\text{APE}}, x_2 + e_2^{\text{APE}}, \dots, x_n + e_n^{\text{APE}}).$$

670 APE is commonly implemented in two ways: *sinusoidal* and *learnable*. For ViT on a  $H \times W$  grid,  
671 let the  $k$ -th token have 2D coordinates  $(p_k^x, p_k^y)$ . The sinusoidal APE of dimension  $d$  is defined as

$$672 \begin{aligned} 673 e_k^{\text{APE}}(4t) &= \sin\left(\frac{p_k^x}{10^{4t/(\lfloor d \rfloor/4)}}\right), \\ 674 e_k^{\text{APE}}(4t+1) &= \cos\left(\frac{p_k^x}{10^{4t/(\lfloor d \rfloor/4)}}\right), \\ 675 e_k^{\text{APE}}(4t+2) &= \sin\left(\frac{p_k^y}{10^{4t/(\lfloor d \rfloor/4)}}\right), \\ 676 e_k^{\text{APE}}(4t+3) &= \cos\left(\frac{p_k^y}{10^{4t/(\lfloor d \rfloor/4)}}\right), \end{aligned} \tag{6}$$

677  
678 for  $t = 0, 1, \dots$ . Alternatively,  $e_k^{\text{APE}} \in \mathbb{R}^d$  can be set as a trainable parameter and learned end-to-  
679 end. In our experiments, this learnable APE serves as the APE baseline.

### 682 B.2 RELATIVE POSITION EMBEDDING (RPE)

683  
684 APE is straightforward and efficient but does not encode relative positions. A common remedy is to  
685 add a *relative positional bias* (RPB) directly to the attention logits:

$$686 \text{Attn}'(i, j) = \text{Attn}(i, j) + M_{i,j}^{\text{RPB}},$$

687 where  $M_{i,j}^{\text{RPB}} = e^{\text{RPB}}(\Delta p_{ij})$  and

$$688 \Delta p_{ij} = (p_i^x - p_j^x, p_i^y - p_j^y).$$

689 For a  $H \times W$  grid,  $e^{\text{RPB}} \in \mathbb{R}^{(2H-1) \times (2W-1)}$  stores a bias value for each possible relative offset.  
690 The table  $e^{\text{RPB}}$  can be either learnable or predefined (e.g., as a deterministic function of inter-token  
691 distance). In all comparisons, we adopt a learnable RPB implementation as the RPE baseline.

## 692 C DERIVATION OF THE ROTATION AXIS OF $R_n(p_i)^\top R_n(p_j)$

693  
694 Given token positions  $p_i, p_j$  and an auxiliary point  $n$ , the Householder matrix is

$$695 R_n(p_i) = I - 2v_n(p_i)v_n(p_i)^\top; R_n(p_j) = I - 2v_n(p_j)v_n(p_j)^\top, \tag{7}$$

702 where

$$703 \quad v_n(p_i) = \frac{n - p_i}{\|n - p_i\|}; v_n(p_j) = \frac{n - p_j}{\|n - p_j\|}. \quad (8)$$

704 Since the three points  $n, p_i, p_j \in \mathbb{S}^2$  are non-collinear, they determine a unique plane. In particular,  
705 this plane is spanned by  $v_n(p_i)$  and  $v_n(p_j)$ :

$$706 \quad \Pi(n, p_i, p_j) = \{n + \alpha v_n(p_i) + \beta v_n(p_j) : \alpha, \beta \in \mathbb{R}\}. \quad (9)$$

707 Equivalently, a unit normal of  $\Pi$  is

$$708 \quad u = \frac{v_n(p_i) \times v_n(p_j)}{\|v_n(p_i) \times v_n(p_j)\|_2}, \quad (10)$$

709 and  $u$  is well-defined because  $v_n(p_i)$  and  $v_n(p_j)$  are linearly independent.

710 Moreover, since  $u \perp \text{span}\{v_n(p_i), v_n(p_j)\}$ , we have

$$711 \quad u^\top v_n(p_i) = u^\top v_n(p_j) = 0. \quad (11)$$

712 Consequently, for  $m \in \{i, j\}$ ,

$$713 \quad R_n(p_m) u = (I - 2 v_n(p_m) v_n(p_m)^\top) u = u, \quad (12)$$

714 i.e.,  $u$  is an eigenvector of  $R_n(p_m)$  with eigenvalue 1, therefore  $u$  is an eigenvector of  
715  $R_n(p_i)^\top R_n(p_j)$  with eigenvalue 1, which means it is the rotation axis of  $R_n(p_i)^\top R_n(p_j)$ .

## 716 D EXPERIMENT SETTING

717 **Computing environment.** Experiments are conducted on a single node with  $8 \times$  NVIDIA A100-  
718 PCIe-40GB GPUs. The NVIDIA driver version is 550.54.14 with CUDA 12.4. The host CPU is a  
719 dual-socket Intel Xeon Gold 6248R @ 3.0 GHz (24 cores per socket; physical cores / 96 threads in  
720 total), organized into two NUMA nodes with AVX/AVX2/AVX-512 support.

721 **Spherical image classification** Dataset preparation follows (Esteves et al., 2023; 2020). After  
722 downloading the original MNIST dataset, the Spherical MNIST variant can be generated using the  
723 scripts provided in our repository. We use a standard Vision Transformer (ViT) with patch size  $2 \times 2$ ,  
724 length 8, a hidden dimension of 384, and 8 attention heads. Training uses a batch size of 16 and  
725 an initial learning rate of  $3 \times 10^{-4}$ . We optimize with Adam ( $\beta_1 = 0.9$ ,  $\beta_2 = 0.999$ ) and apply a  
726 cosine-annealing learning-rate scheduler for 40 epochs.

727 **Weather Forecasting** Table5 lists all variables used in the experiments. For all atmospheric vari-  
728 ables, we use 13 pressure levels: 50, 100, 150, 200, 250, 300, 400, 500, 600, 700, 850, 925, and  
729 1000 hPa.

730 In experiments, We use a standard Vision Transformer (ViT) with patch size  $2 \times 2$ , length 12, a hidden  
731 dimension of 384, and 8 attention heads. Training uses a batch size of 4 and an initial learning rate  
732 of  $5 \times 10^{-4}$ . We optimize with Adam ( $\beta_1 = 0.9$ ,  $\beta_2 = 0.999$ ) and apply a cosine-annealing  
733 learning-rate scheduler for 20 epochs.

756  
757  
758  
759  
760  
761  
762  
763  
764  
765  
766  
767  
768  
769  
770  
771  
772  
773  
774  
775  
776  
777  
778  
779  
780  
781  
782  
783  
784  
785  
786  
787  
788  
789  
790  
791  
792  
793  
794  
795  
796  
797  
798  
799  
800  
801  
802  
803  
804  
805  
806  
807  
808  
809

Table 5: Variables used in our experiments. The “Type” column indicates whether the variable represents a static property, a time-varying single-level property (e.g., surface variables are included), or a time-varying atmospheric property.

| Type        | Variable name             | Short name | Role            |
|-------------|---------------------------|------------|-----------------|
| Atmospheric | Geopotential              | Z          | Input/Predicted |
| Atmospheric | Specific humidity         | Q          | Input/Predicted |
| Atmospheric | Temperature               | T          | Input/Predicted |
| Atmospheric | U component of wind       | U          | Input/Predicted |
| Atmospheric | V component of wind       | V          | Input/Predicted |
| Single      | 2 metre temperature       | T2M        | Input/Predicted |
| Single      | 2 metre Specific humidity | Q2M        | Input/Predicted |
| Single      | 10 metre u wind component | 10U        | Input/Predicted |
| Single      | 10 metre v wind component | 10V        | Input/Predicted |
| Single      | Mean sea level pressure   | msl        | Input/Predicted |
| Static      | Land-sea mask             | lsm        | Input           |
| Static      | Geopotential at surface   | Z          | Input           |
| Clock       | Zenith Angle              | n/a        | Input           |
